# Supplementary material for: Structural determinants of macrocyclization in substrate-controlled lanthipeptide biosynthetic pathways
Source: PubMed Central journal article supplement — Chem Sci. 2020 Jun 25;11(47):12854–70. doi: 10.1039/d0sc01651a (PMC8163290; doi:10.1039/d0sc01651a), 2020-06-25
Supplement: SC-011-D0SC01651A-s002.pdf [file SC-011-D0SC01651A-s002.pdf]

mass HX 1.008 ! defined by LZ, UIUC  
mass HXX 1.008 !defined by LZ, UIUC  
mass CX 12.011 !defined by LZ, UIUC  
mass CXX 12.011 !defined by LZ, UIUC

!=====

residue DALA ! D-ALA ; defined by LZ, UIUC; PDB ligand name is DAL

group

atom N type=NH1 charge=-0.36 end  
atom HN type=H charge= 0.26 end

group

atom CA type=CT charge= 0.00 end  
atom HA type=HA charge= 0.10 end

group

atom CB type=CT charge=-0.30 end  
atom HB1 type=HA charge= 0.10 end  
atom HB2 type=HA charge= 0.10 end  
atom HB3 type=HA charge= 0.10 end

group

atom C type=C charge= 0.48 end  
atom O type=O charge=-0.48 end

bond N HN

bond N CA bond CA HA

bond CA CB bond CB HB1 bond CB HB2 bond CB HB3

bond CA C

bond C O

improper HA C N CB ! change from L-aa: a N c b, to D-aa: a C N b, stereo CA

improper HB1 HB2 CA HB3 !stereo CB

end

residue ABU ! define ABU ; defined by LZ, UIUC; PDB ligand name is ABA

group

atom N type=NH1 charge=-0.36 end  
atom HN type=H charge= 0.26 end

group

atom CA type=CT charge= 0.00 end  
atom HA type=HA charge= 0.10 end

group

atom CB type=CT charge=-0.20 end

```

atom HB1 type=HA charge= 0.10 end
atom HB2 type=HA charge= 0.10 end
group
atom CG type=CT charge=-0.30 end
atom HG1 type=HA charge= 0.10 end
atom HG2 type=HA charge= 0.10 end
atom HG3 type=HA charge= 0.10 end
group
atom C type=C charge= 0.48 end
atom O type=O charge=-0.48 end

bond N HN
bond N CA bond CA HA
bond CA CB bond CB HB1 bond CB HB2
bond CB CG bond CG HG1 bond CG HG2 bond CG HG3
bond CA C
bond C O

improper HA N C CB !stereo CA

improper HB1 HB2 CA CG !stereo CB, HA HA CT CT: -78.874 methylene
improper HG1 HG2 CB HG3 !stereo CG, HA HA CT HA: -66.514 methyl

dihedral CG CB CA N !dihedral X CT CT X kdih 3 0.0 chi1-chi4, where 3=n, multiplicity,
0.0=phase shift, already defined in par file as X CT CT X

end

residue DABU !define DABU ; defined by LZ, UIUC; PDB ligand name is DBB
group
atom N type=NH1 charge=-0.36 end
atom HN type=H charge= 0.26 end
group
atom CA type=CT charge= 0.00 end
atom HA type=HA charge= 0.10 end
group
atom CB type=CT charge=-0.20 end
atom HB1 type=HA charge= 0.10 end
atom HB2 type=HA charge= 0.10 end
group
atom CG type=CT charge=-0.30 end
atom HG1 type=HA charge= 0.10 end
atom HG2 type=HA charge= 0.10 end
atom HG3 type=HA charge= 0.10 end
group
atom C type=C charge= 0.48 end

```

atom O type=O charge=-0.48 end

bond N HN

bond N CA bond CA HA

bond CA CB bond CB HB1 bond CB HB2

bond CB CG bond CG HG1 bond CG HG2 bond CG HG3

bond CA C

bond C O

improper HA C N CB !stereo CA ! change stero from L-ABU to D-ABU: HA N C CB

improper HB1 HB2 CA CG !stereo CB

improper HG1 HG2 CB HG3 !stereo CG

dihedral CG CB CA N

end

residue DHB ! define DHB; defined by LZ, UIUC; PDB ligand name is DBU

group

atom N type=NH1 charge=-0.670 end

atom HN type=H charge= 0.360 end

atom CA type=CXX charge= 0.310 end

group

atom CB type=CXX charge=-0.15 end

atom HB type=HXX charge= 0.15 end

group

atom CG type=CT charge=-0.27 end

atom HG1 type=HA charge= 0.090 end

atom HG2 type=HA charge= 0.090 end

atom HG3 type=HA charge= 0.090 end

group

atom C type=C charge= 0.635 end

atom O type=O charge=-0.635 end

bond N HN

bond N CA

bond CA CB bond CB HB

bond CB CG bond CG HG1 bond CG HG2 bond CG HG3

bond CA C

bond C O

improper C CA CB CG

improper N CA CB CG

improper N CA CB HB

improper C CA CB HB

DONOR HN N  
ACCEPTOR O C

end

residue DHA ! define DHA ; defined by LZ, UIUC

group

atom N type=NH1 charge=-0.670 end  
atom HN type=H charge= 0.360 end  
atom CA type=CXX charge= 0.310 end

group

atom CB type=CXX charge=-0.420 end  
atom HB1 type=HX charge= 0.210 end  
atom HB2 type=HXX charge= 0.21 end

group

atom C type=C charge= 0.635 end  
atom O type=O charge=-0.635 end

! double CA CB

bond N HN

bond N CA

bond CA CB bond CB HB1 bond CB HB2

bond CA C

bond C O

! bond C +N

!improper CA CB C N !stereo CA, Zhu 5/10/2017, based on Turpin's paper

!improper CA CB C N !stereo CA, Zhu 5/10/2017, based on Turpin's paper

! improper C CA +N O !stereo CA, Zhu 5/10/2017, based on Turpin's paper

improper N CA CB HB1 !added 6/28/19

improper N CA CB HB2 !added 6/28/19

improper C CA CB HB1

improper C CA CB HB2

DONOR HN N

ACCEPTOR O C

end

presidue ABUS ! S-link between HB1 of ABU and CYS ...ABU - S - CYS...  
! defined by LZ, UIUC

group

delete atom 1HB1 end

```

    modify  atom 1CB  charge= 0.10 end ! to make the new bond charge to zero
group
  delete  atom 2HG          end
  modify  atom 2SG  charge=-0.10 end ! make the net charge to zero for the new bond

add bond 1CB 2SG

add angle 1CA 1CB 2SG
add angle 1CB 2SG 2CB
add angle 1HB2 1CB 2SG ! 5/9/2017

add dihedral 1CA 1CB 2SG 2CB ! Zhu 5/9/2017
add dihedral 1CB 2SG 2CB 2CA

!! add improper LZ 5/8/2020 fix CB stereochemistry of L-LABU to (R)
improper 1HB2 1CA 2SG 1CG    !!stereo CB for former Ser/Thr residue that is R at CA and
R at CB

end

presidue ABS          ! S-link between HB1 of ABU and CYS ...ABU - S - CYS...
! added by Zhu, L based on DISU 1/2/2015
group
  delete  atom 1HB1          end
  modify  atom 1CB  charge= 0.10 end ! to make the new bond charge to zero
group
  delete  atom 2HG          end
  modify  atom 2SG  charge=-0.10 end ! make the net charge to zero for the new bond

add bond 1CB 2SG

add angle 1CA 1CB 2SG
add angle 1CB 2SG 2CB
add angle 1HB2 1CB 2SG ! 5/9/2017

add dihedral 1CA 1CB 2SG 2CB ! Zhu 5/9/2017
add dihedral 1CB 2SG 2CB 2CA

!! add improper LZ 5/8/2020 fix CB stereochemistry of D-ABU to (S)
improper 1HB2 2SG 1CG 1CA    !!stereo CB for former Ser/Thr residue that is S at CA and S
at CB

end

presidue ALAS        ! S-link bet. S link between ALA and CYS with a single -C-S-C-...

```

```
! defined by LZ, UIUC
group
  delete  atom 1HB1      end
  modify  atom 1CB  charge= 0.20 end

group
  delete  atom 2HG      end
  modify  atom 2SG  charge=-0.20 end

add bond 1CB 2SG

add angle 1CB 2SG 2CB
add angle 1CA 1CB 2SG
add angle 1HB2 1CB 2SG
add angle 1HB3 1CB 2SG ! 5/9/2017

add dihedral 1CA 1CB 2SG 2CB ! Zhu 5/9/2017
add dihedral 1CB 2SG 2CB 2CA

end
```

```
!=====
=====
```
