# Supplementary material for: Structural determinants of macrocyclization in substrate-controlled lanthipeptide biosynthetic pathways
Source: PubMed Central journal article supplement — Chem Sci. 2020 Jun 25;11(47):12854–70. doi: 10.1039/d0sc01651a (PMC8163290; doi:10.1039/d0sc01651a), 2020-06-25
Supplement: SC-011-D0SC01651A-s003.pdf [file SC-011-D0SC01651A-s003.pdf]

! BONDS ! based on Turpin paper: RSC Adv 2014, 4, 48621-48631

|      |         |        |       |                                       |
|------|---------|--------|-------|---------------------------------------|
| bond | CXX HX  | \$kbon | 1.08  | ! defined for DHB and DHA by LZ, UIUC |
| bond | CXX HXX | \$kbon | 1.08  | ! defined for DHB and DHA by LZ, UIUC |
| bond | CXX CT  | \$kbon | 1.509 | ! defined for DHB by LZ, UIUC         |
| bond | CXX CXX | \$kbon | 1.40  | ! defined for DHB and DHA by LZ, UIUC |
| bond | CXX NH1 | \$kbon | 1.410 | ! defined for DHB and DHA by LZ, UIUC |
| bond | CXX C   | \$kbon | 1.510 | ! defined for DHB and DHA by LZ, UIUC |

! ANGLES

! based on Turpin paper: RSC Adv 2014, 4, 48621-48631

! New CHARMM force field parameters for dehydrated amnio acid resdies, the key to Lantibiotic Molecular  
! dynamic simulation

! added 5/14/2017, L Zhu

|       |             |       |       |                                        |
|-------|-------------|-------|-------|----------------------------------------|
| angle | CXX CXX C   | 60.00 | 120.0 | ! defined for DHA and DHB by LZ, UIUC  |
| angle | CXX CXX NH1 | 80.00 | 128.0 | ! defined for DHA and DHB by LZ, UIUC  |
| angle | C CXX NH1   | 80.00 | 110.0 | ! defined for DHA and DHB by LZ, UIUC  |
| angle | CXX CXX HX  | 45.00 | 120.5 | ! defined for DHA and DHB by LZ, UIUC  |
| angle | CXX CXX HXX | 45.00 | 120.5 | ! defined for DHA and DHB by LZ, UIUC  |
| angle | CXX C NH1   | 80.00 | 116.5 | ! defined for DHA and DHB by LZ, UIUC  |
| angle | CXX C O     | 80.00 | 122.5 | ! defined for DHA and DHB by LZ, UIUC  |
| angle | CXX C N     | 80.0  | 119.0 | ! defined for DHB-Pro link by LZ, UIUC |
| angle | CXX NH1 C   | 50.00 | 120.0 | ! defined for DHA and DHB by LZ, UIUC  |
| angle | CXX NH1 H   | 34.00 | 117.0 | ! defined for DHA and DHB by LZ, UIUC  |
| angle | CXX CXX CT  | 43.50 | 126.5 | ! defined for DHB by LZ, UIUC          |
| angle | HXX CXX CT  | 43.50 | 118.0 | ! defined for DHB by LZ, UIUC          |
| angle | HX CXX HXX  | 43.50 | 118.0 | ! defined for DHA by LZ, UIUC          |
| angle | CXX CT HA   | 80.0  | 109.5 | ! defined for DHB by LZ, UIUC          |

! IMPROPERs based on Turpin paper: RSC Adv 2014, 4, 48621-48631

! For dihedrals and improper, the following convention was adopted:  
 ! All dihedral terms maintaining planarity (esp. omega) have been  
 ! converted into improper. The only dihedrals left are around  
 ! rotatable bonds.

```

improper C  CXX +NH1 O  $kpla 0 180.0 ! defined for DHA and DHB by LZ, UIUC
improper C  CXX N O    $kpla 0 180.0 ! defined for DHA and DHB by LZ, UIUC
improper CXX C  NH1 CT  $kpla 0 180.0 ! defined for DHA and DHB, backbone to next resid, by LZ, UIUC
improper CXX C  N  CT   $kback 0 180.0 ! NH peptide planarity, DHB link to PRO, by LZ, UIUC
improper HA HA  CXX HA  $kchi 0 -66.514 ! defined for DHB by LZ, UIUC
improper O  C  NH1 CXX  $kpla 0 0.0 ! CO peptide planarity, front; defined for DHA and DHB by LZ, UIUC
improper CT C  NH1 CXX  $kpla 0 180.0 ! new trans peptide bond; defined for DHA and DHB by LZ, UIUC
improper H  NH1 C  CXX  $kpla 0 0.0 ! NH peptide planarity; defined for DHA and DHB by LZ, UIUC
improper C  CXX CXX CT  $kpla 0 -180.0 ! defined for DHB by LZ, UIUC
improper CXX CXX C N   $kpla 0 0.0 ! defined for DHB by LZ, UIUC
improper NH1 CXX CXX CT  $kpla 0 0.0 ! defined for DHB by LZ, UIUC
improper C  CXX CXX HX  $kpla 0 -180.0 ! defined for DHA by LZ, UIUC
improper C  CXX CXX HXX  $kpla 0 0.0 ! defined for DHB by LZ, UIUC
improper NH1 CXX CXX HX  $kpla 0 0.0 ! defined for DHB by LZ, UIUC
improper NH1 CXX CXX HXX $kpla 0 180.0 ! defined for DHB by by LZ, UIUC
improper CXX CXX CT  HXX  $kpla 0 180.0 !defined for DHB by LZ, UIUC
improper CXX CXX C  O    $kpla 0 180.0 ! defined for DHB and DHA by by LZ, UIUC

```

! based on Turpin paper: RSC Adv 2014, 4, 48621-48631

```

dihedral H  NH1 CXX CXX  2.5000 2 180.0 ! defined for DHB and DHA by LZ, UIUC
dihedral CXX CXX NH1 H   2.5000 2 180.0 ! defined for DHA and DHB by LZ, UIUC
dihedral C  CXX NH1 H    2.5000 2 180.0 ! defined for DHA and DHB by LZ, UIUC
dihedral CXX C  NH1 H    2.5000 2 180.0 ! defined for DHA and DHB by LZ, UIUC
dihedral CXX CXX NH1 C   0.5000 1 180.0 ! defined for DHA and DHB by LZ, UIUC
dihedral CXX CXX NH1 C   0.5000 2 0.0 ! defined for DHA and DHB by LZ, UIUC
dihedral CXX CXX NH1 C   0.2000 3 180.0 ! defined for DHA and DHB by LZ, UIUC

```

```

improper C   CXX NH1 O    120.000 0  0.0  ! defined for DHA and DHB CO peptide planarity, self; by LZ, UIUC
improper CXX CXX C  NH1   72.000 0  0.0  ! CA chirality, self; defined by LZ, UIUC
improper HA  CT  S  CT    $kchi  0  65.977  ! CB chirality; for L-Abu in CyllL/S of ABUS linker (R at CB); defined by LZ,
UIUC
improper HA  S  CT  CT    $kchi  0 -65.977  ! CB chirality; for D-Abu of ABS linker (S at CB); defined by LZ, UIUC

dihedral CT  CT  S  CT    0.2400 1  180.0 ! chi1 - chi4 defined for ALAS and ABUS; defined by LZ, UIUC
dihedral CT  CT  S  CT    0.3700 3  0.0  ! chi1 - chi4 defined for ALAS and ABUS; defined by LZ, UIUC
dihedral CT  S  CT  CT    0.2400 1  180.0 ! chi1 - chi4 defined for ALAS and ABUS; defined by LZ, UIUC
dihedral CT  S  CT  CT    0.3700 3  0.0  ! chi1 - chi4 defined for ALAS and ABUS; defined by LZ, UIUC
dihedral CT  S  CT  HA    0.2800 3  0.0  ! chi1 - chi4 defined for ALAS and ABUS; defined by LZ, UIUC

dihedral CT  CT  CT  NH1    $kdih  3  0.0 ! chi1 - chi4, defined for ABU; defined by LZ, UIUC

```

```

NONBonded CXX    0.1450 3.2072    0.1450 3.2072 ! LZ

```

```

!!!!!!!!!!!!!!!!!!!!!!!!!!!!!!!!!!!!!!!!!!!!!!!!!!!!!!!!!!!!!!!!!!!!!!!!!!!!!!!!!!!!!!!!!!!!!!!!!!!!!!!!!!!!!!!!!!!!!!!!

```

```

! NONBONDED

```

```

! MolProbit vdw radii.

```

```

! (Table 1 in [Word et. al (1999) J. Mol. Biol. 285:1711].)

```

```

nonbonded HX    0.0045 $S_HH    0.0045 $S_HH ! defined for DHB and DHA by LZ, UIUC
nonbonded HXX   0.0045 $S_HH    0.0045 $S_HH ! defined for DHB and DHA by LZ, UIUC

```

```

!=====

```
